# Supplementary material for: A Mucin-Like Protein Is Essential for Oviposition in Nilaparvata lugens
Source: PubMed Central journal article supplement (PMC6530529; doi:10.3389/fphys.2019.00551), 2019-05-15
Supplement: Table_1.pdf [file Table_1.pdf]

**Table S1.** Primers used in this work.

| Primer usage                  | Primer name | Primer sequence (5'- 3')                             | Concentration |
|-------------------------------|-------------|------------------------------------------------------|---------------|
| double stranded RNA synthesis | T7NIESMuc-F | TAATACGACTCACTATAGGGCAAACAGTAC<br>AACTGCACCTCC       | 10mM          |
|                               | T7NIESMuc-R | TAATACGACTCACTATAGGGGCTTGGCGAT<br>ACTGTGCCAGG        | 10mM          |
|                               | T7GFP-F     | TAATACGACTCACTATAGGGAGAATGAGTA<br>AAGGAGAAGAACTTTTC  | 10mM          |
|                               | T7GFP-R     | TAATACGACTCACTATAGGGAGATTTGTAT<br>AGTTCATCCATGCCATGT | 10mM          |
| quantitative real-time PCR    | qNIESMuc-F  | AGTGGCATTTCGTTCTTAAAGG                               | 10mM          |
|                               | qNIESMuc-R  | TGTGGTTGTGGCTTGTGG                                   | 10mM          |
|                               | RPS11-F     | CCGATCGTGTGGCGTTGAAGGG                               | 10mM          |
|                               | RPS11-R     | ATGGCCGACATTCTCCAGGTCC                               | 10mM          |
|                               | 18S-F       | GTAACCCGCTGAACCTCCT                                  | 10mM          |
|                               | 18S-R       | TCCGAAGACCTCACTAAATC                                 | 10mM          |

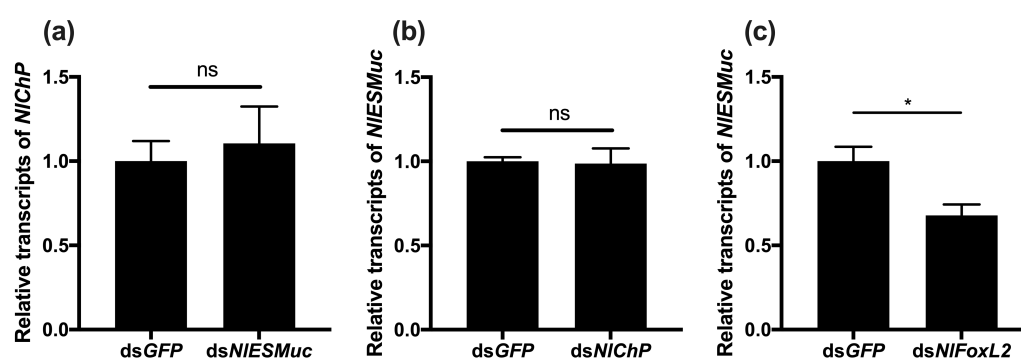

**Figure S1.** (a) The expression level of a known eggshell protein gene *NlChP* in ds*NIESMuc*-injected female BPHs at 72 h post emergence. There was no significant difference. (b) The expression level of *NIESMuc* in ds*NlChP*-injected female BPHs at 72 h post emergence. There was no significant difference. (c) The expression level of *NIESMuc* after the RNAi of *NlFoxL2*, which regulates eggshell formation in BPHs, at 72 h post emergence. The mRNA level of *NIESMuc* decreased by 32.24% ( $p = 0.04$ ).
